# Supplementary material for: Design and engineering of an artificial disulfide bond in human cytochrome c to regulate the protein structure and function
Source: Royal Society of Chemistry journal article supplement (doi:10.1039/d3me00196b), 2024-01-01
Supplement: d3me00196b1.pdf [file d3me00196b1.pdf]

## Supplemental Materials

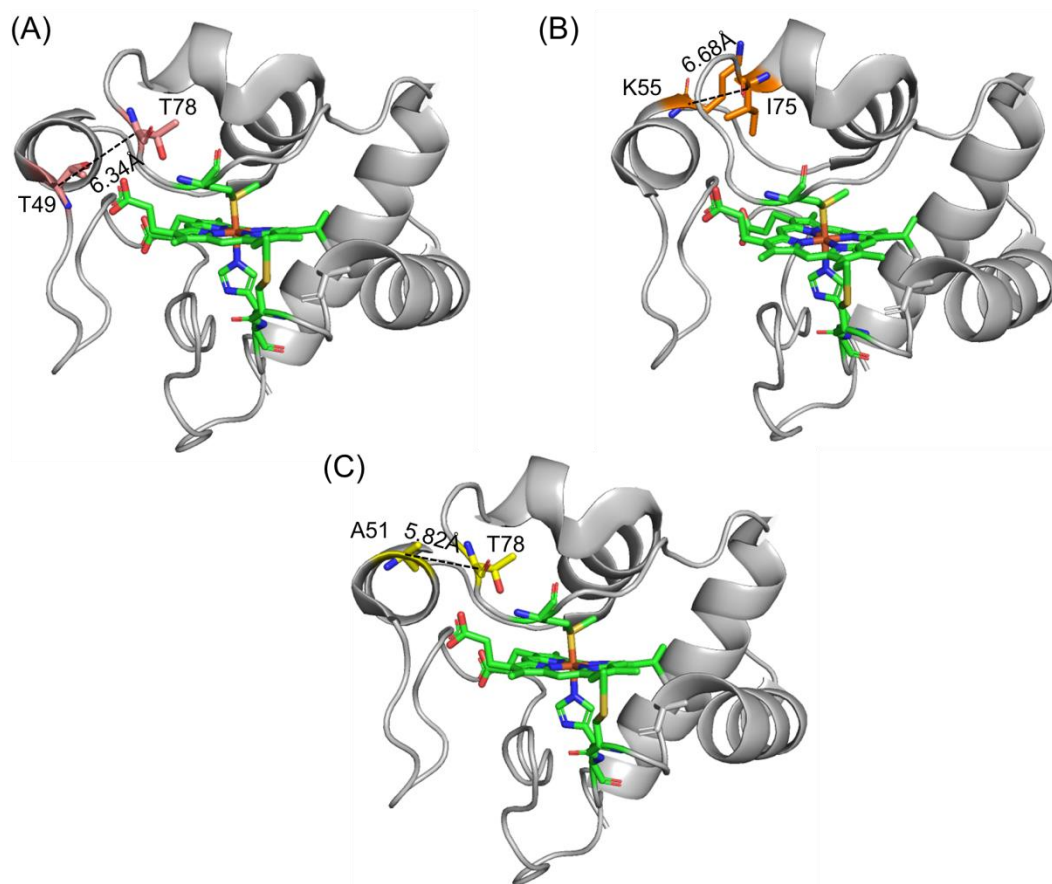

**Fig. S1** Possible targets for disulfide engineering as predicted by the web-server Yosshi. The distances between the amino acids in loops C and D are indicated by dashed lines. (A) T49-T78, (B) K55-I75, and (C) A51-T78.

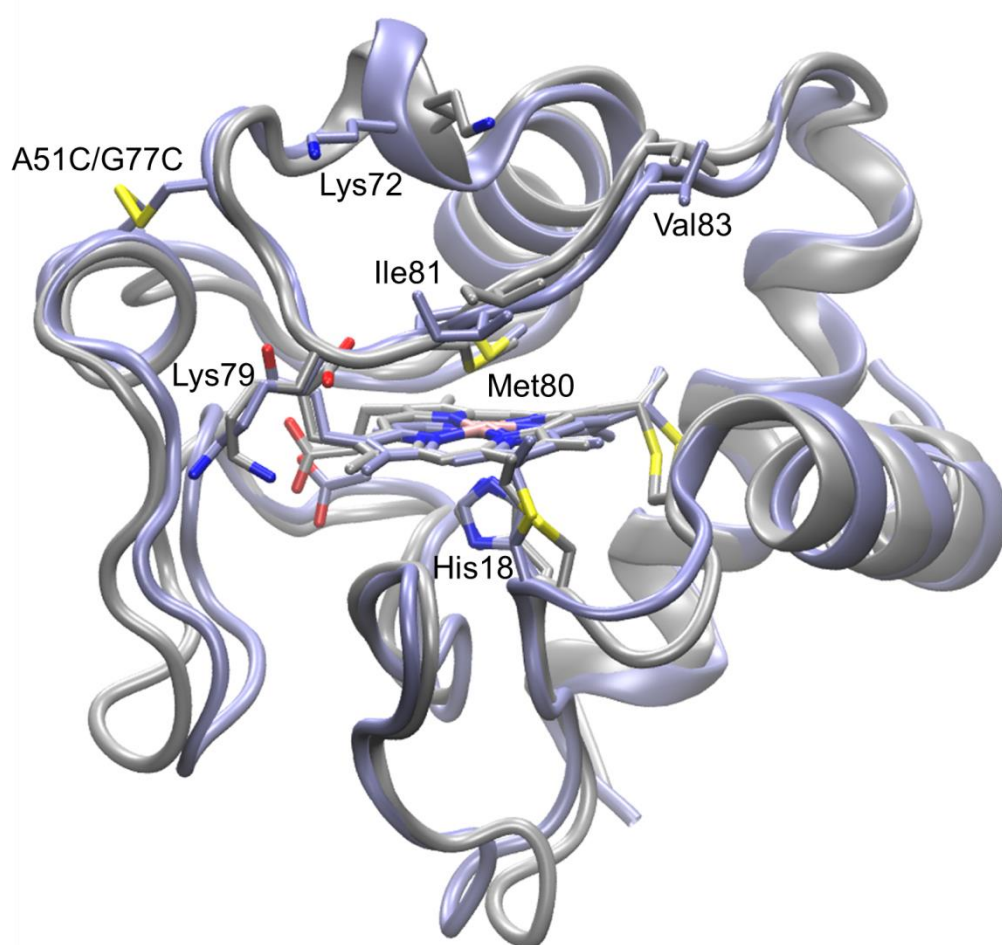

**Fig. S2** Overlay of the simulated structure of A51C/G77C *hCyt c* (blue) with the solution structure of WT *hCyt c* (PDB code 2N9J, gray) showing the conformational changes upon formation of the disulfide bond Cys51-Cys77.

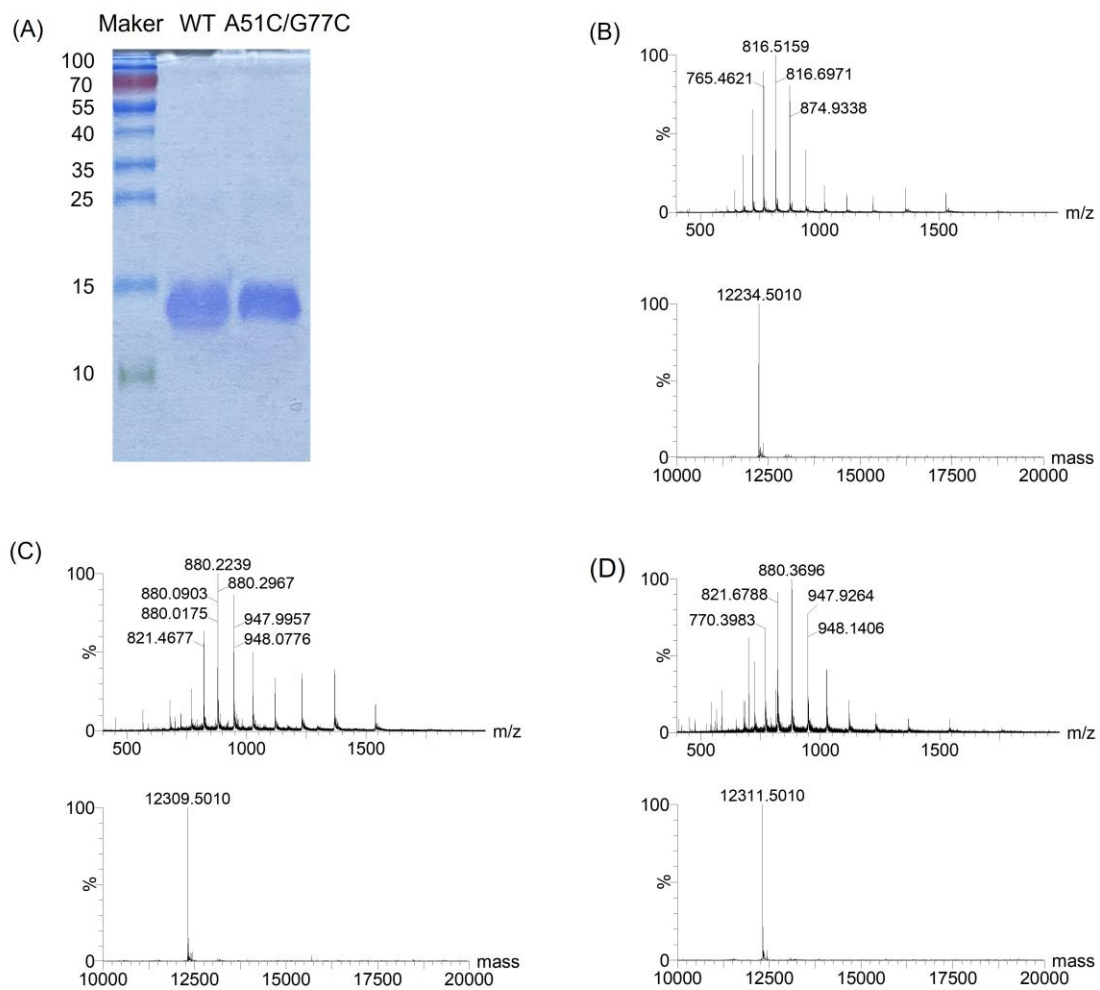

**Fig. S3** (A) SDS-PAGE of the purified WT and A51C/G77C *hCyt c*. The protein marker was shown for comparison. ESI-MS spectra of the purified (B) WT *hCyt c*, (C) A51C/G77C *hCyt c* and (D) treated with reducing agent TCEP.

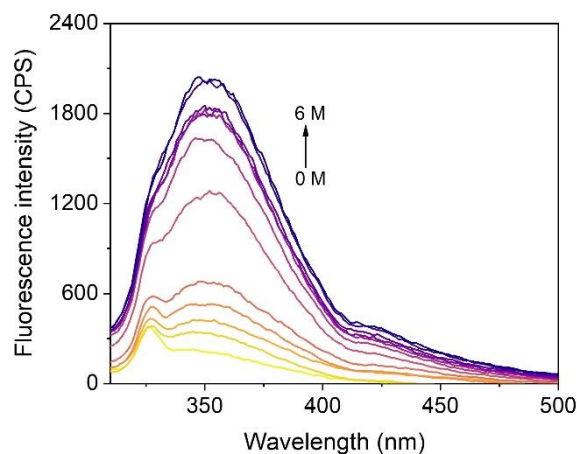

**Fig. S4** Fluorescence spectra of WT *hCyt c* varied with the concentration of guanidine hydrochloride (0-6 M).

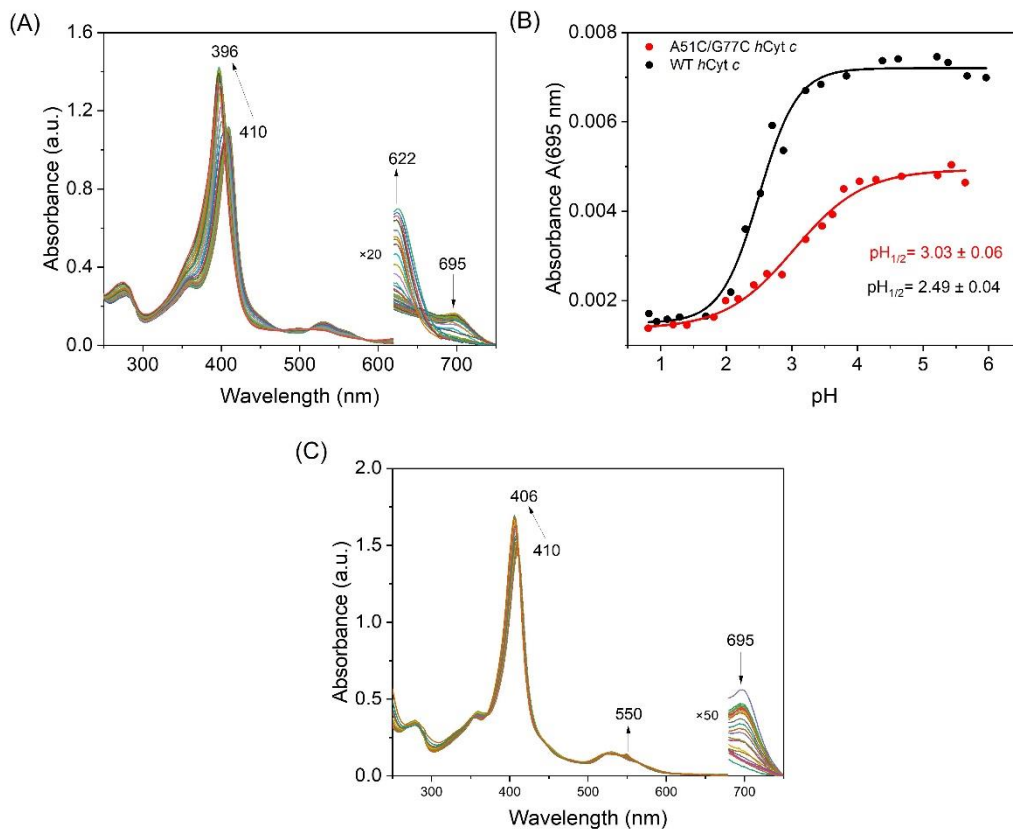

**Fig. S5** (A) pH-dependent UV-vis spectra changes of the WT *hCyt c* in acidic unfolding studies; (B) Plot of 695 nm versus pH for acid unfolding of WT and A51C/G77C *hCyt c*; (C) pH-dependent UV-vis spectra changes of the WT *hCyt c* in alkaline transition studies.

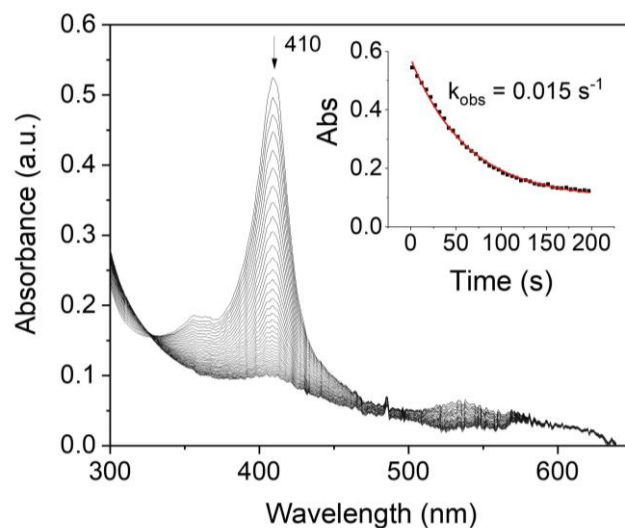

**Fig. S6** Time-dependent UV-vis spectra of WT *hCyt c* in a reaction with 100 mM  $\text{H}_2\text{O}_2$ . The spectral change of the Soret band was shown as an inset.

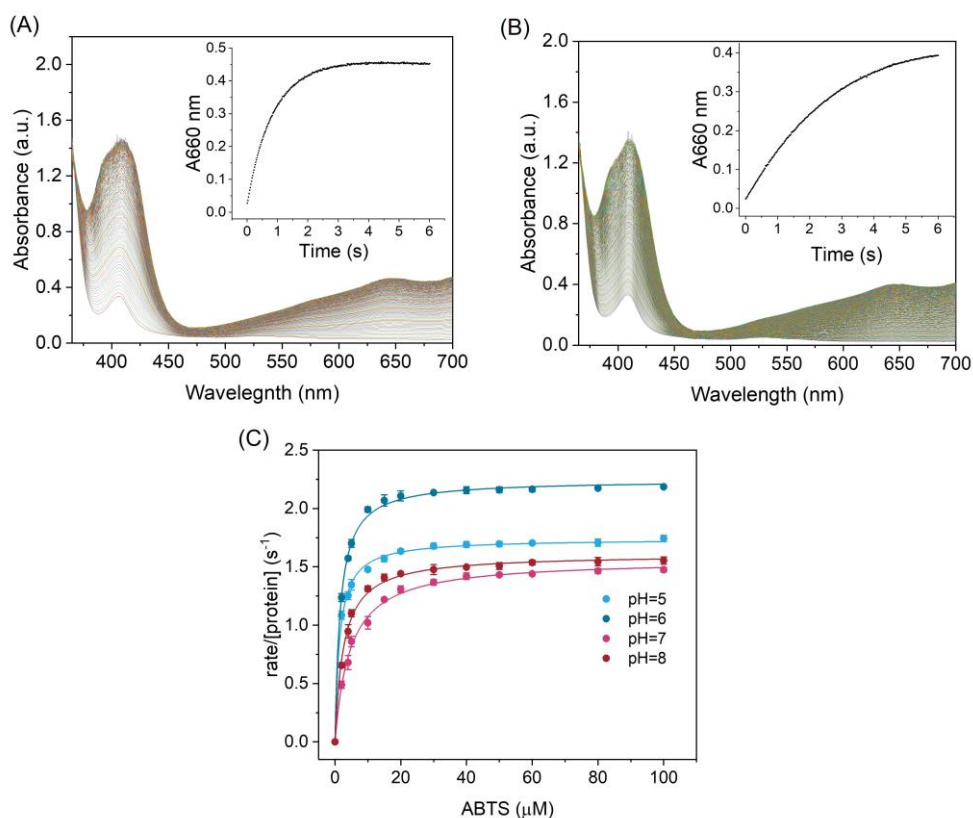

**Fig. S7** Peroxidase activity assay using ABTS as a substrate. Stopped-flow kinetic of ABTS (0.1 mM) catalyzed by (A) A51C/G77C and (B) WT *hCyt c* in the presence of  $\text{H}_2\text{O}_2$ . (C) Michaelis-Menten plots vs the concentrations of ABTS for WT *hCyt c* at pH 5–8.
